# Supplementary material for: Investigation of Rare Single-Nucleotide PCDH15 Variants in Schizophrenia and Autism Spectrum Disorders
Source: PubMed Central journal article supplement (PMC4825995; doi:10.1371/journal.pone.0153224), 2016-04-08
Supplement: pone.0153224.s001.pdf [file pone.0153224.s001.pdf]

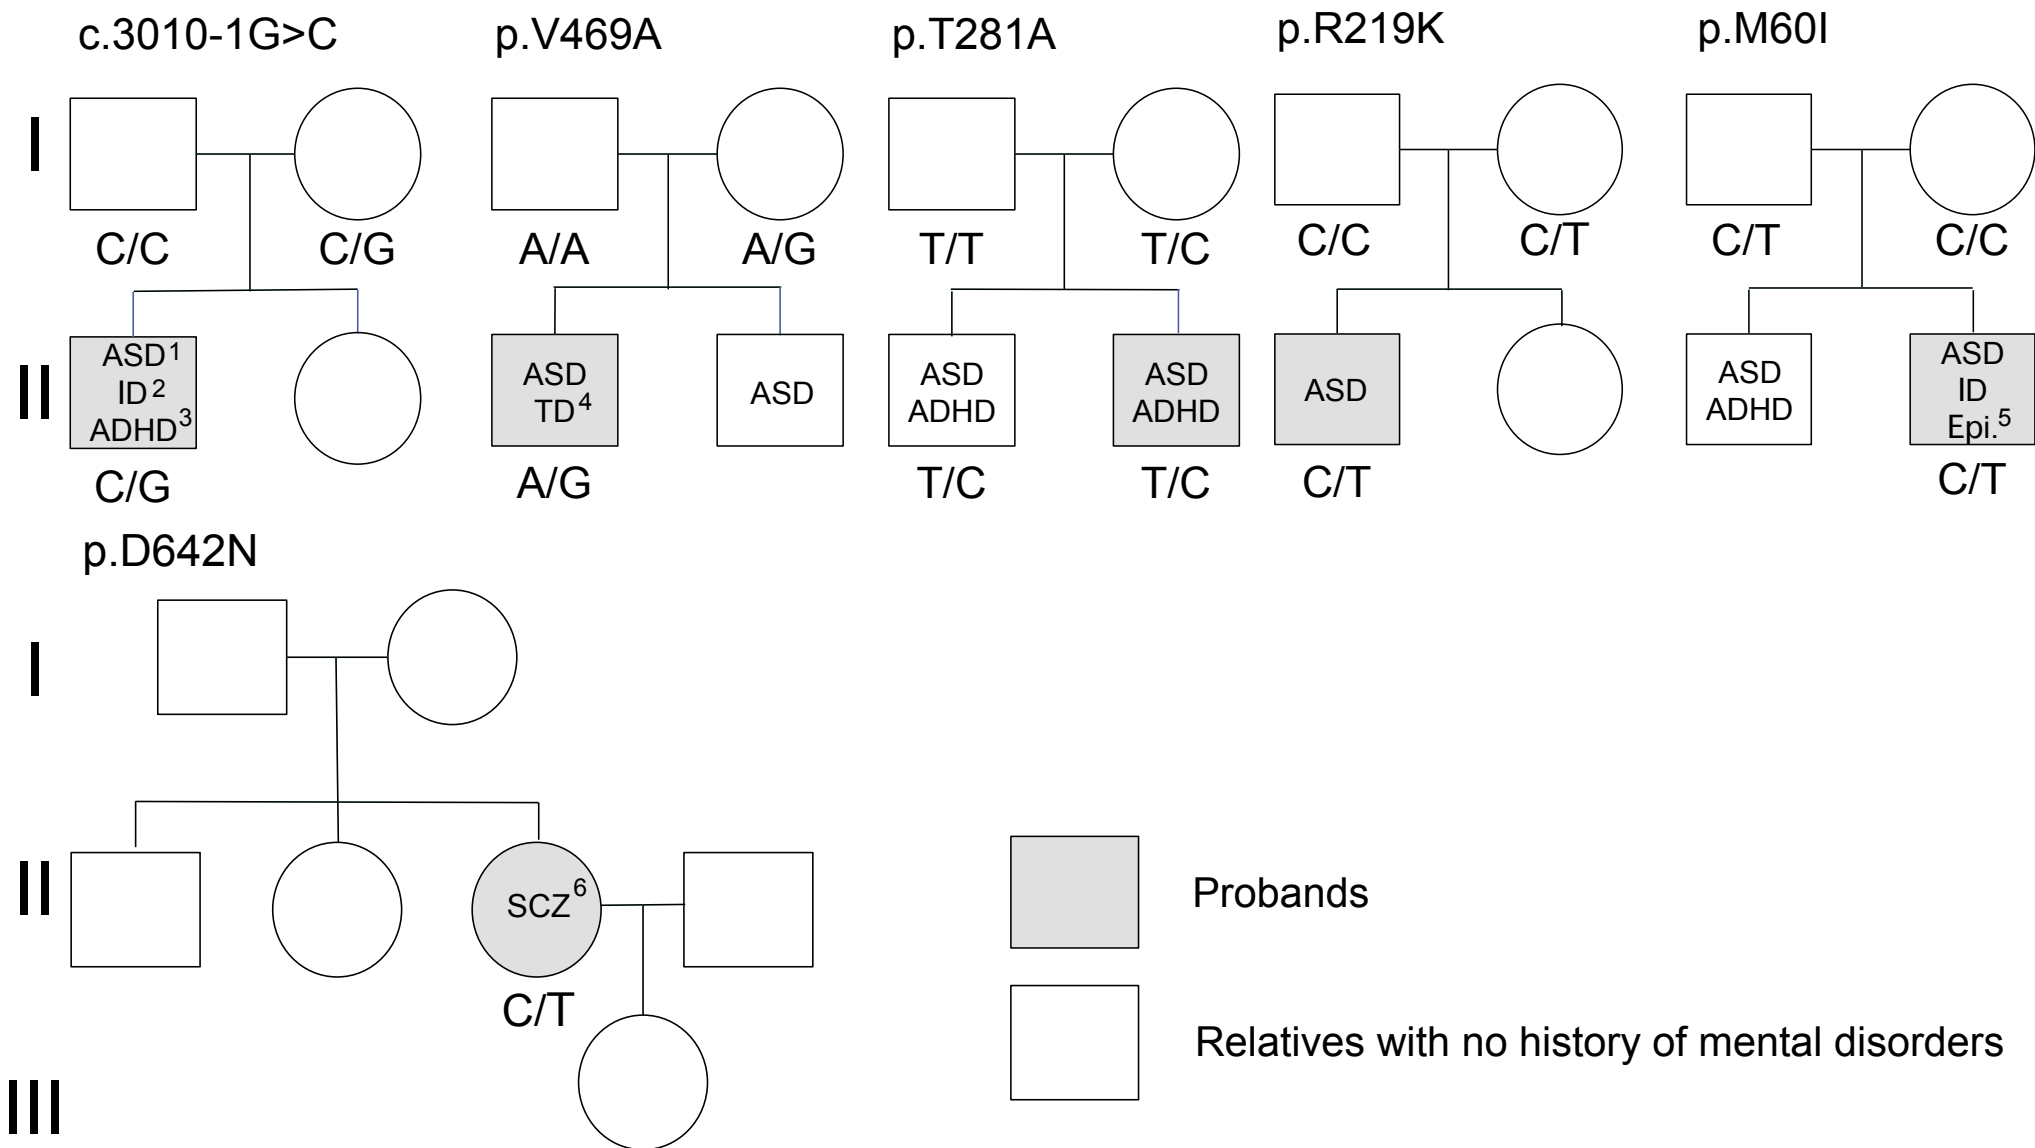

**S1 Fig. Brief information and segregation analysis of cases with six novel variants**
