# Supplementary material for: Investigation of Rare Single-Nucleotide PCDH15 Variants in Schizophrenia and Autism Spectrum Disorders
Source: PubMed Central journal article supplement (PMC4825995; doi:10.1371/journal.pone.0153224), 2016-04-08
Supplement: pone.0153224.s002.pdf [file pone.0153224.s002.pdf]

**S1 Table. Primer sequences for validating each variant**

| Variant     | Forward primer (5'-3')         | Reverse primer (3'-5')          |
|-------------|--------------------------------|---------------------------------|
| p.I1313T    | TGGTTGCTATTGTAACCAAAGAGCT      | CAGAAAGCCCATTGGACTGTCA          |
| p.D1237Y    | CTATAAACTGAAAACACTGACCTATGGCTA | GCTCTTCCATAATATGAGGAGATCCTACTT  |
| p.I1185M    | CTTCCCATAGTCGTCAGTTGCAATAA     | CCATTCATAAGGGTTATCTTTTCCTGCTT   |
| p.G1151R    | CATAATTCCGCATACCTTCACTCTGA     | CATGGCATCTAGAAATGGCTTTTGATTTAT  |
| c.3010-1G>C | AGAGACTCCTTTCAAAAATGCCCT       | CCAGGCAATCCAATAAGTAAAAACATACAT  |
| p.R962C     | CTGTCATCTGTTAAGCCAAATTCTCTATC  | TCATTGCACTGTGTTTTAACTTGGTAAC    |
| p.D642N     | ACAAACAGCTGAAAGCCTCTGA         | GGACATTCTGTGCTATTAGTTTCAAGC     |
| p.V495I     | CCCAGGTCTCATGTCTGTATAAACA      | TTGTTAAACTGTAAGAGCAAACCTCTGTACT |
| p.V469A     | TTTTTCAGTTTTAACCAGACATCTCTTTCA | AAAAGACCCAGAGCTTCACCTTT         |
| p.Y462C     | TTTTTCAGTTTTAACCAGACATCTCTTTCA | AAAAGACCCAGAGCTTCACCTTT         |
| p.S399R     | TCTATGTCCTTGTCCAGAGCTACTATTC   | ACTCCAAAAGATAGCACGACATATACTTT   |
| p.P315L     | TCCTTGGAATTGAGAGAATTTGTTACTGT  | TTCATGAAGTATTAGTAATGCGGCTGAA    |
| p.T281A     | TCCCATTGGGTTTTAAACATGCAAAT     | GAGATGACTTGGGTCCAATGTTTCT       |
| p.R219K     | ACTCACATTAGCTTGGATTATGACAAAGT  | TCATCTCTAACTTCCAAGAGGATTAATCCA  |
| p.G100R     | TAACGGTTCTCCAGGACACAGA         | GTGGATTACTGGGTGTTGATGGAT        |
| p.M60I      | GGTGCTGTTTCAGGAAAAGCATT        | GGTTTAAGAGCATGATCTTTGCTAAAGAAT  |
