# Supplementary material for: Investigation of Rare Single-Nucleotide PCDH15 Variants in Schizophrenia and Autism Spectrum Disorders
Source: PubMed Central journal article supplement (PMC4825995; doi:10.1371/journal.pone.0153224), 2016-04-08
Supplement: pone.0153224.s003.pdf [file pone.0153224.s003.pdf]

**S2 Table. Probe sequences for TaqMan SNP assays**

| <b>Variant</b> | <b>Forward primer (5'-3')</b>      | <b>Reverse primer (3'-5')</b> | <b>Reporter 1 (5'-3')</b>  | <b>Reporter 2 (5'-3')</b>  |
|----------------|------------------------------------|-------------------------------|----------------------------|----------------------------|
| c.3010-1G>C    | CCAGGCAATCCAATAAGTAAAAACATACAT     | GGCTCCCCATCATCAAAAGCA         | VIC-CCACCAACTTAAAAAG-NFQ   | FAM-CCACCAAGTAAAAAG-NFQ    |
| p.D642N        | TCAATTACTTGATAATTGAATTATGTTTTCTCTC | CAATGGCATATGTTATTGAGTCTCCCT   | VIC-TGAAGGCAACTGATCGAG-NFQ | FAM-AAGGCAACTAATCGAG-NFQ   |
| p.V469A        | GACCCAGAGCTTCACCTTTTTCT            | GAAAAGGTGTAAGTTTGCTGTTCTT     | VIC-CCCTGTCCACTGGTTG-NFQ   | FAM-CCTGTCCGCTGGTTG-NFQ    |
| p.T281A        | TGTGCCAAACACTCGTGATTG              | CAACTCAGGTATGGCAGCTTG         | VIC-CCGTCCACTCACTTAT-NFQ   | FAM-CGTCCACTCGCTTAT-NFQ    |
| p.R219K        | CTTGGATTATGACAAAGTAGCGAGTCT        | ACCTTTGAAATCCCCTAATGTTGACT    | VIC-CATAGTTGAGCCTCTTCC-NFQ | FAM-ATAGTTGAGCTTCTTCC-NFQ  |
| p.M60I         | AGTAGAATATGTTTTCAAGTACCTTTCTTTGG   | CAGGATCCATCAACACCCAGTAATC     | VIC-TGGACAACATGCTGATCA-NFQ | FAM-TGGACAACATACTGATCA-NFQ |
