# Supplementary material for: Investigation of Rare Single-Nucleotide PCDH15 Variants in Schizophrenia and Autism Spectrum Disorders
Source: PubMed Central journal article supplement (PMC4825995; doi:10.1371/journal.pone.0153224), 2016-04-08
Supplement: pone.0153224.s004.pdf [file pone.0153224.s004.pdf]

### S3 Table. Association results for each phenotype

| Exon <sup>a</sup> | Ref | Val | Position<br>(GRCh38) | Variant     | ASD                            |                              |                             | SCZ                            |                              |                             | Control                        |                           |
|-------------------|-----|-----|----------------------|-------------|--------------------------------|------------------------------|-----------------------------|--------------------------------|------------------------------|-----------------------------|--------------------------------|---------------------------|
|                   |     |     |                      |             | Genotype<br>Count <sup>b</sup> | Minor<br>allele<br>frequency | <i>P</i> value <sup>c</sup> | Genotype<br>Count <sup>a</sup> | Minor<br>allele<br>frequency | <i>P</i> value <sup>c</sup> | Genotype<br>Count <sup>a</sup> | Minor allele<br>frequency |
| 5' side of 23     | C   | G   | 10:53959845          | c.3010-1G>C | 0/0/378                        | 0                            | 1                           | 0/0/1707                       | 0                            | 1                           | 0/0/1909                       | 0                         |
| 16                | C   | T   | 10:54090057          | p.D642N     | 0/0/380                        | 0                            | 1                           | 0/0/1707                       | 0                            | 1                           | 0/0/1905                       | 0                         |
| 12                | A   | G   | 10:54185168          | p.V469A     | 0/0/375                        | 0                            | 1                           | 0/1/1716                       | 0.00029                      | 0.47                        | 0/0/1908                       | 0                         |
| 8                 | T   | C   | 10:54317306          | p.T281A     | 0/0/381                        | 0                            | 1                           | 0/0/1710                       | 0                            | 1                           | 0/0/1911                       | 0                         |
| 7                 | C   | T   | 10:54329645          | p.R219K     | 0/0/381                        | 0                            | 1                           | 0/0/1705                       | 0                            | 1                           | 0/0/1915                       | 0                         |
| 4                 | C   | T   | 10:54378920          | p.M60I      | 0/0/381                        | 0                            | 1                           | 0/2/1709                       | 0.00058                      | 0.27                        | 0/5/1906                       | 0.0013                    |
